# Supplementary material
Source: PubMed Central journal article supplement (PMC4297749)
Supplement: NIHMS645846-supplement-1.pdf [file NIHMS645846-supplement-1.pdf]

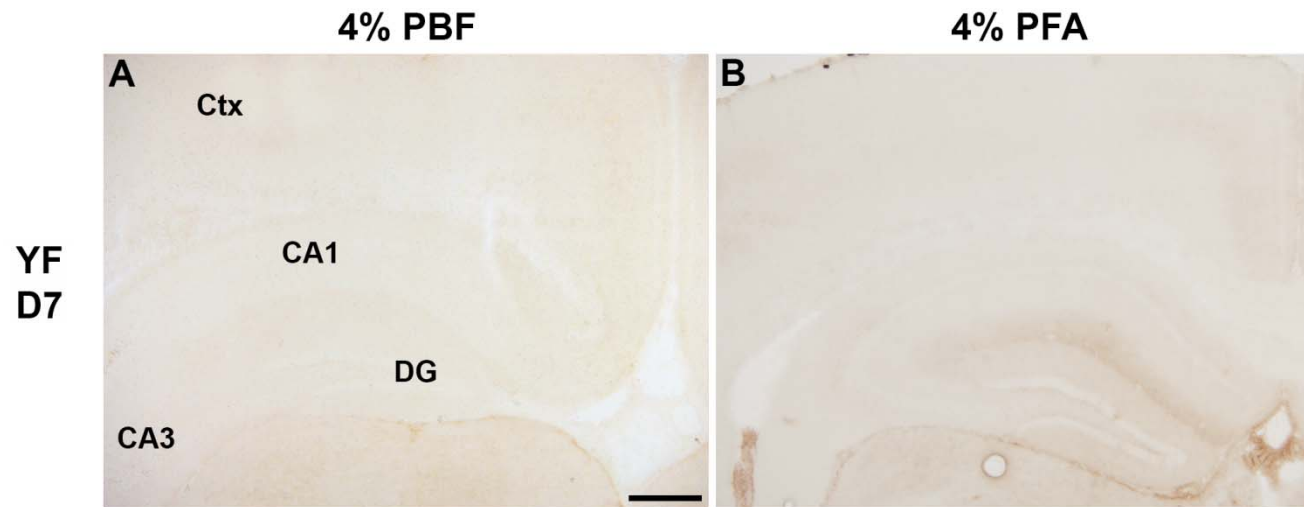

**Suppl. Fig. S1: Absence of signal when using rat IgG2a isotype control antibody**

Replacement of the CD4/CD8 antibodies with rat IgG2a isotype control resulted in absence of signal in brains of YF-17D i.c. infected mice day 7 post infection, both after fixation with 4% phosphate buffered formaline (PBF) (A) and 4% paraformaldehyde (PFA) (B). CA1-3: cornu ammonis 1 and 3; Ctx: cortex; DG: dentate gyrus; v: vessel. Scale bar: 400  $\mu$ m.
